# Supplementary material for: The pitfalls and challenges in the diagnosis and treatment of patients with carotid near-occlusion: a narrative review
Source: PubMed Central journal article supplement — Quant Imaging Med Surg. 2024 Nov 18;14(12):9600–19. doi: 10.21037/qims-24-1037 (PMC11651966; doi:10.21037/qims-24-1037), 2024-11-18
Supplement: qims-14-12-9600-rc.pdf [file qims-14-12-9600-rc.pdf]

## Narrative Review Checklist

| Section/Topic             | Item No | Item                                                                                                                                                                               | Reported on Page Number/Line Number                                        | Reported on Section/Paragraph                                                                              |
|---------------------------|---------|------------------------------------------------------------------------------------------------------------------------------------------------------------------------------------|----------------------------------------------------------------------------|------------------------------------------------------------------------------------------------------------|
| <b>TITLE</b>              |         |                                                                                                                                                                                    |                                                                            |                                                                                                            |
| Title                     | 1       | Identify the report as a Narrative Review or Literature Review.                                                                                                                    | Page 1/ Line 1-2                                                           | Title                                                                                                      |
| <b>ABSTRACT</b>           |         |                                                                                                                                                                                    |                                                                            |                                                                                                            |
| Structured summary        | 2       | Provide a structured summary with the subsections as: Background and Objective, Methods, Key Content and Findings, Conclusions.                                                    | Page 1/ Line 19-42                                                         | Abstract/ Paragraph 1-4                                                                                    |
| <b>INTRODUCTION</b>       |         |                                                                                                                                                                                    |                                                                            |                                                                                                            |
| Rationale/background      | 3       | Describe the rationale for the review in the context of what is already known.                                                                                                     | Page 2/ Line 46-83                                                         | Introduction/ Paragraph 1                                                                                  |
| Objectives                | 4       | Specify the key question(s) identified for the review topic.                                                                                                                       | Page 2/ Line 80-83                                                         | Introduction/ Paragraph 1                                                                                  |
| <b>METHODS</b>            |         |                                                                                                                                                                                    |                                                                            |                                                                                                            |
| Research selection        | 5       | Specify the process for identifying the literature search (eg, years considered, language, publication status, study design, and databases of coverage).                           | Page 2-3/ Line 86-95                                                       | Method/ Paragraph 2                                                                                        |
| <b>DISCUSSION/SUMMARY</b> |         |                                                                                                                                                                                    |                                                                            |                                                                                                            |
| Narrative                 | 6       | Discuss: 1) research reviewed including fundamental or key findings, 2) limitations and/or quality of research reviewed, and 3) need for future research.                          | Page 3-4/ Line 97-157<br>Page 4-8/ Line 159-349<br>Page 9-14/ Line 351-574 | Pathomechanism/<br>Paragraph 3-4<br>Diagnostic imaging/<br>Paragraph 5-12<br>Treatment/ Paragraph<br>13-23 |
| Summary                   | 7       | Provide an overall interpretation of the narrative review in the context of clinical practice for health professionals, policy development and implementation, or future research. | Page 14/ Line 576-594                                                      | Conclusion/ Paragraph 24                                                                                   |

Article information: <https://dx.doi.org/10.21037/qims-24-1037>

\*As the checklist was provided upon initial submission, the page number/line number reported may be changed due to copyediting and may not be referable in the published version. In this case, the section/paragraph may be used as an alternative reference.
